# Supplementary material for: DNA Methylation Level Changes in Transgenic Chinese Cabbage (Brassica rapa ssp. pekinensis) Plants and Their Effects on Corresponding Gene Expression Patterns
Source: MDPI journal article supplement (doi:10.3390/genes12101563), 2021-09-30
Supplement: s1 [file s1]

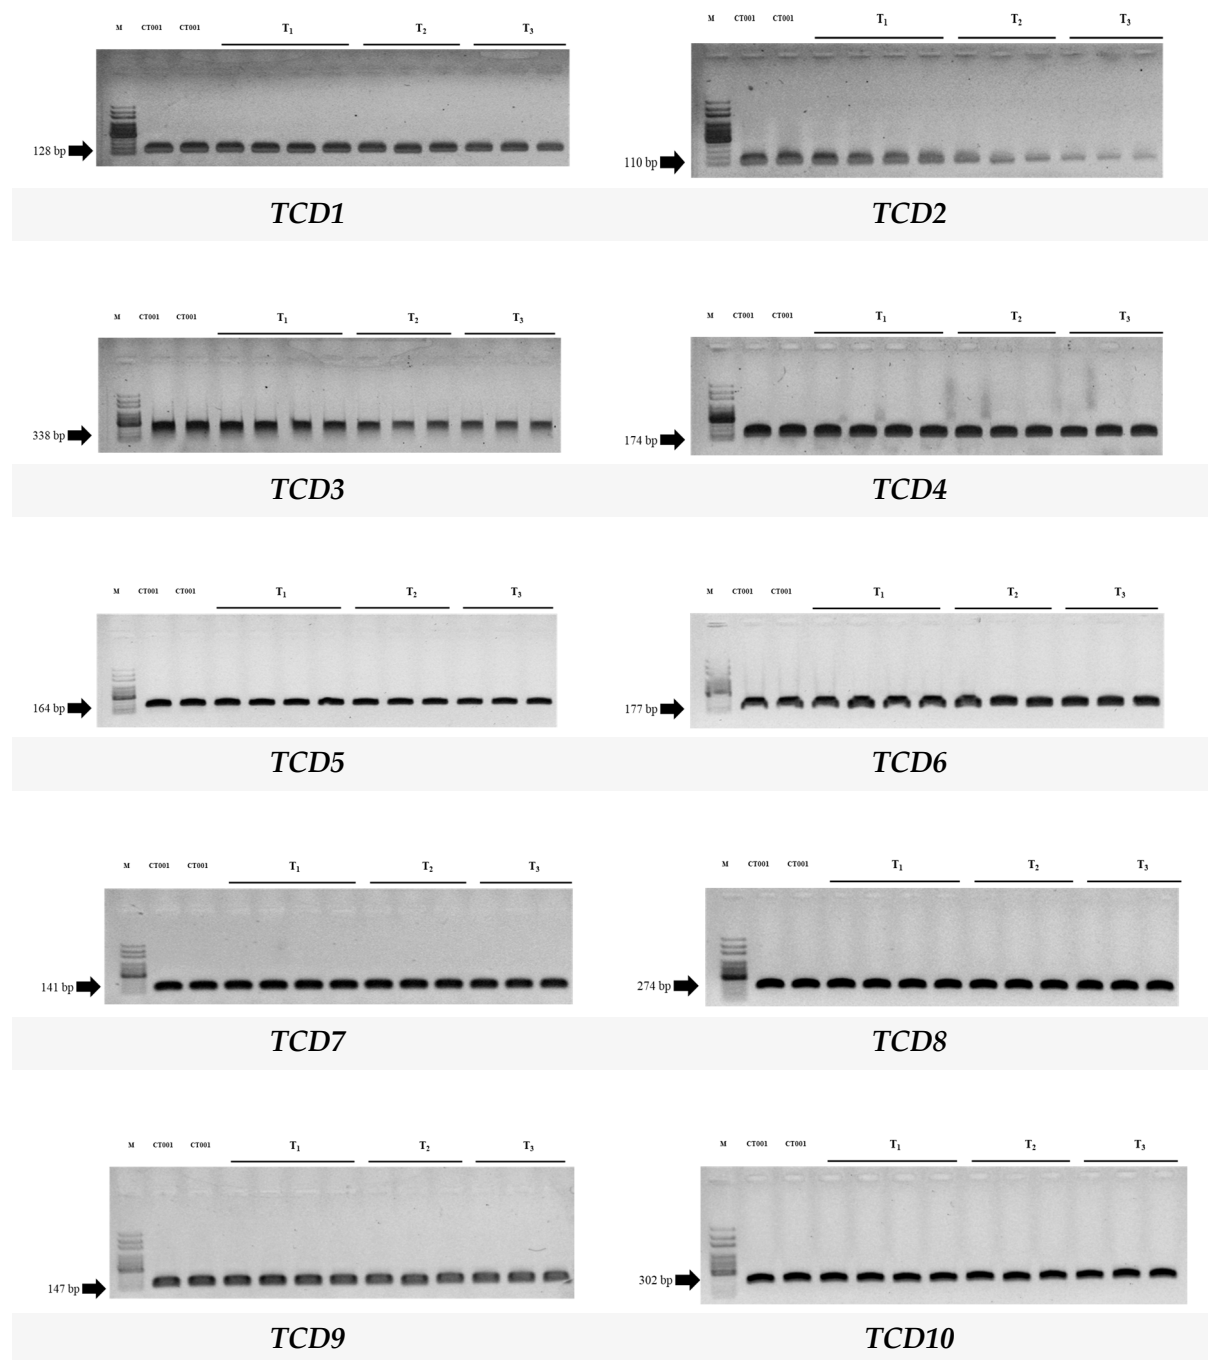

**Figure S1.** RT-PCR analysis of the non-transgenic and transgenic lines using primer sets for transformant-conserved DMRs (TCDs).

**Table S1.** List of primer sets for quantitative RT-PCR analysis.

| Name          | Primer         | Sequence (5'→3')            | Expected product size (bp) |
|---------------|----------------|-----------------------------|----------------------------|
| <i>TCD 1</i>  | F <sup>z</sup> | GAA CAC GGG TGA TGG AGA T   | 128                        |
|               | R              | ACC TCA TAC CTG CCA AAC G   |                            |
| <i>TCD 2</i>  | F              | AAC TCA TCA GAA ATC CTC CTC | 110                        |
|               | R              | AGA CGG CGA GTT TGA GAG A   |                            |
| <i>TCD 3</i>  | F              | CTC CAC CAA CAA GTC TCC     | 338                        |
|               | R              | GGA GAC TTG TTG GTG GAG     |                            |
| <i>TCD 4</i>  | F              | ATG CCT GAA TCA AAT GCT CGC | 174                        |
|               | R              | GCC TTC TCC GAG CAT CTT AG  |                            |
| <i>TCD 5</i>  | F              | GAT GTG TAT AAC CCT CAG TGC | 164                        |
|               | R              | GCC ACC ACT TCC CAA GTT TC  |                            |
| <i>TCD 6</i>  | F              | GAG GTC CAG AAT GCT GAG G   | 177                        |
|               | R              | GGT AGA CTA ATC AAT CTG CGC |                            |
| <i>TCD 7</i>  | F              | CAC AAT CGA GGA GCG AAA C   | 141                        |
|               | R              | TCA CGG ATC GTT TTG ACG C   |                            |
| <i>TCD 8</i>  | F              | AGG AGG AGG TGG TGG AGA TT  | 274                        |
|               | R              | CGC CTT TGT GAA TAC CGT TT  |                            |
| <i>TCD 9</i>  | F              | TTG GGA AAG TCT TAC GCA AAG | 147                        |
|               | R              | CCC AAC TTG AAG CAG AGA AG  |                            |
| <i>TCD 10</i> | F              | GTT TAG CCG CGT GGG AGA AA  | 302                        |
|               | R              | CTT GCT GAG ATT CTT GGA TCC |                            |

<sup>z</sup>F, forward primer; R, reverse primer

**Table S2.** List of primer sets for methylation-specific PCR analysis.

| Name             | Primer          | Sequence (5'→3')                   | Expected product size (bp) |
|------------------|-----------------|------------------------------------|----------------------------|
| <b>MSP TCD 8</b> | MF <sup>z</sup> | TAT TAA ATA GAG AAT ATT AGG TCG A  | 288                        |
|                  | MR              | ATA CTT CGT AAT AAC ACT AAA CGA C  |                            |
|                  | UF <sup>y</sup> | TTA TTA AAT AGA GAA TAT TAG GTT GA | 290                        |
|                  | UR              | AAT ACT TCA TAA TAA CAC TAA ACA AC |                            |

<sup>z</sup>M, forward and reverse primers of methylated DNA; <sup>y</sup>U, forward and reverse primers of unmethylated DNA

**Table S3.** Average methylation level in total genome of the non-transgenic and transgenic lines.

| Context        |        | CpG                 |                                       | CHG                 |                                       | CHH                 |                                       |
|----------------|--------|---------------------|---------------------------------------|---------------------|---------------------------------------|---------------------|---------------------------------------|
|                | Name   | Total methylated Cs | Relative ratio of <sup>m</sup> Cs (%) | Total methylated Cs | Relative ratio of <sup>m</sup> Cs (%) | Total methylated Cs | Relative ratio of <sup>m</sup> Cs (%) |
| Control        | CT001  | 38,834,362          | 62.80%                                | 13,158,821          | 24.30%                                | 14,228,984          | 9.10%                                 |
| T <sub>1</sub> | IGA7   | 36,018,799          | 62.70%                                | 11,907,922          | 23.80%                                | 12,110,178          | 8.50%                                 |
| T <sub>2</sub> | IGA74  | 40,956,444          | 62.10%                                | 12,547,429          | 22.10%                                | 13,253,347          | 8.30%                                 |
| T <sub>3</sub> | IGA743 | 39,537,761          | 61.80%                                | 13,144,114          | 23.40%                                | 13,603,249          | 8.40%                                 |

**Table S4.** List of genes within the conserved DMRs identified in the transgenic lines.

| CG                | CHG               | CHH               |
|-------------------|-------------------|-------------------|
| • CT001_A01003170 | • CT001_A01003170 | • CT001_A01011320 |
| • CT001_A01003180 | • CT001_A01003180 | • CT001_A01017400 |
| • CT001_A01023540 | • CT001_A01011320 | • CT001_A01027200 |
| • CT001_A01028720 | • CT001_A01017400 | • CT001_A02036620 |
| • CT001_A01035730 | • CT001_A01023540 | • CT001_A02052780 |
| • CT001_A02052780 | • CT001_A01027200 | • CT001_A02058860 |
| • CT001_A02058860 | • CT001_A01028720 | • CT001_A02065390 |
| • CT001_A02062200 | • CT001_A01035730 | • CT001_A03104360 |
| • CT001_A03084970 | • CT001_A02036620 | • CT001_A03126570 |
| • CT001_A03399340 | • CT001_A02062200 | • CT001_A03397530 |
| • CT001_A04142210 | • CT001_A02065390 | • CT001_A04145490 |
| • CT001_A05162850 | • CT001_A03084970 | • CT001_A04404580 |
| • CT001_A05175920 | • CT001_A03104360 | • CT001_A05182060 |
| • CT001_A06416690 | • CT001_A03126570 | • CT001_A05184770 |
| • CT001_A07241320 | • CT001_A03397530 | • CT001_A06219970 |
| • CT001_A07243410 | • CT001_A03399340 | • CT001_A06225040 |
| • CT001_A07246130 | • CT001_A04142210 | • CT001_A06416690 |
| • CT001_A07264360 | • CT001_A04145490 | • CT001_A07241320 |
| • CT001_A07265300 | • CT001_A04404580 | • CT001_A07246130 |
| • CT001_A07421310 | • CT001_A05162850 | • CT001_A07260420 |
| • CT001_A08299270 | • CT001_A05175920 | • CT001_A07264360 |
| • CT001_A09332120 | • CT001_A05182060 | • CT001_A07265300 |
| • CT001_A09344220 | • CT001_A05184770 | • CT001_A07421310 |
| • CT001_A09347510 | • CT001_A06219970 | • CT001_A08271920 |
| • CT001_A10366390 | • CT001_A06225040 | • CT001_A08273660 |
| • CT001_A10379400 | • CT001_A07241320 | • CT001_A08280970 |
| • CT001_A10381040 | • CT001_A07243410 | • CT001_A08284340 |
| • CT001_A10384790 | • CT001_A07260420 | • CT001_A08299270 |
|                   | • CT001_A07421310 | • CT001_A09317820 |
|                   | • CT001_A08271920 | • CT001_A09327490 |
|                   | • CT001_A08273660 | • CT001_A09332120 |
|                   | • CT001_A08280970 | • CT001_A09343100 |
|                   | • CT001_A08284340 | • CT001_A10366390 |
|                   | • CT001_A09317820 | • CT001_A10379400 |
|                   | • CT001_A09327490 | • CT001_A10381040 |
|                   | • CT001_A09343100 |                   |
|                   | • CT001_A09344220 |                   |
|                   | • CT001_A09347510 |                   |
|                   | • CT001_A10384790 |                   |
